# Supplementary material for: Predictive value of tumor genetic alteration profiling for chemotherapy and EGFR-TKI treatment in advanced NSCLC
Source: PubMed Central journal article supplement — Oncol Lett. 2020 Apr 1;19(6):3859–70. doi: 10.3892/ol.2020.11502 (PMC7202306; doi:10.3892/ol.2020.11502), 2020-04-01
Supplement: Supplementary_Data.pdf [file Supplementary_Data.pdf]

Figure S2. Kaplan-Meier survival analyses in subgroup of patients with EGFR exon 21 mutations with first- or second-generation EGFR-tyrosine kinase inhibitors treatment. (A) Kaplan-Meier estimate for progression-free survival (6.0 months vs. 5.2 months; HR=1.35; 95% CI, 0.32-5.62; P=0.69); (B) Kaplan-Meier estimate for overall survival (NR vs. NR; P=0.38). NR, not reached; HR, hazard ratio.

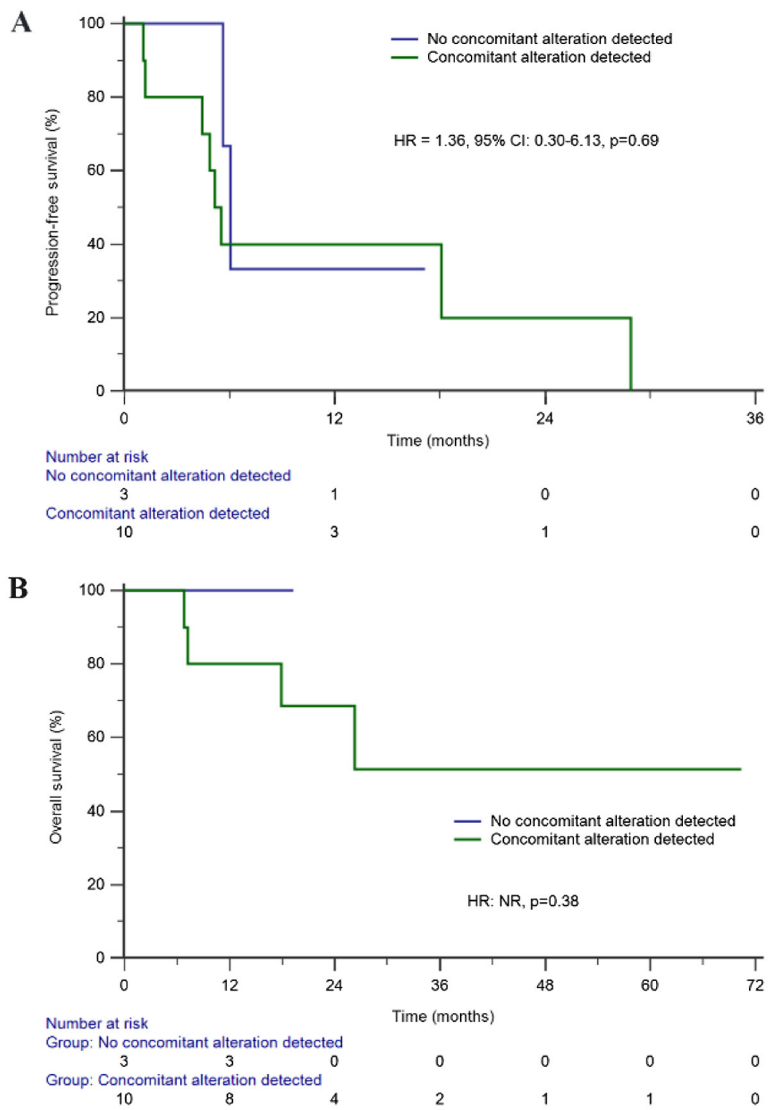

Table SI. Characteristics by genetic alternation status for patients with advanced non-small cell lung cancer receiving first-line chemotherapy.

| Characteristic                                    | Patients, n (%)                   |                                      | Total (n=64)     | P-value |
|---------------------------------------------------|-----------------------------------|--------------------------------------|------------------|---------|
|                                                   | Gene alternations detected (n=52) | Gene alternation not detected (n=12) |                  |         |
| Median age, years (range)                         | 57.0 (27.0-74.0)                  | 56.0 (31.0-74.0)                     | 57.0 (27.0-47.0) | 0.77    |
| Sex                                               |                                   |                                      |                  | 0.83    |
| Male                                              | 33 (63.5)                         | 8 (66.7)                             | 41 (64.1)        |         |
| Female                                            | 19 (36.5)                         | 4 (33.3)                             | 23 (35.9)        |         |
| ECOG performance status                           |                                   |                                      |                  | 0.61    |
| 0-1                                               | 47 (90.4)                         | 10 (83.3)                            | 57 (89.1)        |         |
| 2                                                 | 5 (9.6)                           | 2 (16.7)                             | 7 (10.9)         |         |
| Smoking status                                    |                                   |                                      |                  | 0.33    |
| Yes                                               | 29 (55.8)                         | 9 (75.0)                             | 38 (59.4)        |         |
| No                                                | 23 (44.2)                         | 3 (25.0)                             | 26 (40.6)        |         |
| Histological type                                 |                                   |                                      |                  | 0.21    |
| Non-squamous carcinoma                            | 48 (92.3)                         | 9 (75.0)                             | 57 (89.1)        |         |
| Squamous carcinoma                                | 3 (5.8)                           | 2 (16.7)                             | 5 (7.8)          |         |
| NOS                                               | 1 (1.9)                           | 1 (8.3)                              | 2 (3.1)          |         |
| Clinical stage                                    |                                   |                                      |                  | 0.10    |
| IIIB                                              | 5 (9.6)                           | 4 (33.3)                             | 9 (14.1)         |         |
| IVA                                               | 21 (40.4)                         | 3 (25.0)                             | 24 (37.5)        |         |
| IVB                                               | 26 (50.0)                         | 5 (41.7)                             | 31 (48.4)        |         |
| CNS metastasis                                    |                                   |                                      |                  | 0.73    |
| Yes                                               | 41 (78.8)                         | 10 (83.3)                            | 51 (79.7)        |         |
| No                                                | 11 (21.2)                         | 2 (16.7)                             | 13 (20.3)        |         |
| Chemotherapy regimen                              |                                   |                                      |                  | 0.61    |
| Gemcitabine + Platinum                            | 5 (9.6)                           | 1 (8.3)                              | 6 (9.4)          |         |
| Taxane + Platinum                                 | 7 (13.5)                          | 3 (25.0)                             | 10 (15.6)        |         |
| Pemetrexed + Platinum                             | 40 (76.9)                         | 8 (66.7)                             | 48 (75.0)        |         |
| Previous anticancer regimens for advanced disease |                                   |                                      |                  | 0.48    |
| 0                                                 | 35 (67.3)                         | 10 (83.3)                            | 45 (70.3)        |         |
| ≥1                                                | 17 (32.7)                         | 2 (16.7)                             | 19 (29.7)        |         |

ECOG, Eastern Cooperative Oncology Group; NOS, not otherwise specified; CNS, central nervous system.

Table SII. Characteristics by genetic concomitant alternation status for patients with EGFR-mutant advanced non-small cell lung cancer receiving EGFR tyrosine kinase inhibitors.

| Characteristic                                    | Patients, n (%)                          |                                             | Total, n (%) (n=41) | P-value |
|---------------------------------------------------|------------------------------------------|---------------------------------------------|---------------------|---------|
|                                                   | Concomitant alternations detected (n=28) | Concomitant alternation not detected (n=13) |                     |         |
| Median age, years (range)                         | 62.0 (29.0-79.0)                         | 53.0 (32.0-66.0)                            | 60.0 (29.0-79.0)    | 0.05    |
| Sex                                               |                                          |                                             |                     | 0.07    |
| Male                                              | 17 (60.7)                                | 4 (30.8)                                    | 21 (51.2)           |         |
| Female                                            | 11 (39.3)                                | 9 (69.2)                                    | 20 (48.8)           |         |
| ECOG performance status                           |                                          |                                             |                     | -       |
| 0-1                                               | 26 (92.9)                                | 13 (100.0)                                  | 39 (95.1)           |         |
| 2                                                 | 2 (7.1)                                  | 0 (0.0)                                     | 2 (4.9)             |         |
| Smoking status                                    |                                          |                                             |                     | 0.22    |
| Yes                                               | 12 (42.9)                                | 3 (23.1)                                    | 15 (36.6)           |         |
| No                                                | 16 (57.1)                                | 10 (76.9)                                   | 26 (63.4)           |         |
| Histological type                                 |                                          |                                             |                     | -       |
| Non-squamous carcinoma                            | 26 (92.9)                                | 13 (100.0)                                  | 39 (95.1)           |         |
| Squamous carcinoma                                | 1 (3.6)                                  | 0 (0.0)                                     | 1 (2.4)             |         |
| NOS                                               | 1 (3.6)                                  | 0 (0.0)                                     | 1 (2.4)             |         |
| Clinical stage                                    |                                          |                                             |                     | 0.29    |
| IIIB                                              | 4 (14.3)                                 | 0 (0.0)                                     | 4 (9.8)             |         |
| IVA                                               | 8 (28.6)                                 | 3 (23.1)                                    | 11 (26.8)           |         |
| IVB                                               | 16 (57.1)                                | 10 (76.9)                                   | 26 (63.4)           |         |
| EGFR status                                       |                                          |                                             |                     | 0.49    |
| Exon 19 deletion                                  | 18 (64.3)                                | 10 (76.9)                                   | 28 (68.3)           |         |
| Exon 21 mutation                                  | 10 (35.7)                                | 3 (23.1)                                    | 13 (31.7)           |         |
| CNS metastasis                                    |                                          |                                             |                     | 0.73    |
| Yes                                               | 9 (32.1)                                 | 5 (38.5)                                    | 14 (34.1)           |         |
| No                                                | 19 (67.9)                                | 8 (61.5)                                    | 27 (65.9)           |         |
| Type of TKI                                       |                                          |                                             |                     | -       |
| Erlotinib                                         | 0 (0.0)                                  | 1 (7.7)                                     | 1 (2.4)             |         |
| Gefitinib                                         | 5 (17.9)                                 | 5 (38.5)                                    | 10 (24.4)           |         |
| Afatinib                                          | 2 (7.1)                                  | 0 (0.0)                                     | 2 (4.9)             |         |
| Icotinib                                          | 21 (75.0)                                | 7 (53.8)                                    | 28 (68.3)           |         |
| Previous anticancer regimens for advanced disease |                                          |                                             |                     | 0.15    |
| 0                                                 | 22 (78.6)                                | 7 (53.8)                                    | 29 (70.7)           |         |
| ≥1                                                | 6 (21.4)                                 | 6 (46.2)                                    | 12 (29.3)           |         |

EGFR, epidermal growth factor receptor; ECOG, Eastern Cooperative Oncology Group; NOS, not otherwise specified; TKI, tyrosine kinase inhibitor.

Table SIII. Characteristics by genetic concomitant alternation status for patients with T790M-mutant non-small cell lung cancer receiving osimertinib.

| Characteristic             | Patients, n (%)                        |                                             | Total, n (%) (n=21) | P-value |
|----------------------------|----------------------------------------|---------------------------------------------|---------------------|---------|
|                            | Concomitant alternation detected (n=8) | Concomitant alternation not detected (n=13) |                     |         |
| Median age, years (range)  | 62.0 (29.0-80.0)                       | 58.0 (34.0-75.0)                            | 60.0 (29.0-80.0)    | 0.85    |
| Sex                        |                                        |                                             |                     | 0.67    |
| Men                        | 4 (50.0)                               | 5 (38.5)                                    | 9 (42.9)            |         |
| Women                      | 4 (50.0)                               | 8 (61.5)                                    | 12 (57.1)           |         |
| ECOG performance status    |                                        |                                             |                     | 0.62    |
| 0-1                        | 6 (75.0)                               | 11 (84.6)                                   | 17 (81.0)           |         |
| 2                          | 2 (25.0)                               | 2 (15.4)                                    | 4 (19.0)            |         |
| Smoking status             |                                        |                                             |                     | 0.65    |
| Yes                        | 4 (50.0)                               | 4 (30.8)                                    | 8 (38.1)            |         |
| No                         | 4 (50.0)                               | 9 (69.2)                                    | 13 (61.9)           |         |
| Histological type          |                                        |                                             |                     | -       |
| Non-squamous carcinoma     | 7 (87.5)                               | 13 (100.0)                                  | 20 (95.2)           |         |
| Squamous carcinoma         | 1 (12.5)                               | 0 (0.0)                                     | 1 (4.8)             |         |
| Clinical stage             |                                        |                                             |                     | -       |
| IIIB                       | 1 (12.5)                               | 0 (0.0)                                     | 1 (4.7)             |         |
| IVA                        | 0 (0.0)                                | 3 (23.1)                                    | 3 (14.3)            |         |
| IVB                        | 7 (87.5)                               | 10 (76.9)                                   | 17 (81.0)           |         |
| Co-occurring EGFR mutation |                                        |                                             |                     | 0.35    |
| Exon 19 deletion           | 4 (50.0)                               | 10 (76.9)                                   | 14 (66.7)           |         |
| Exon 21 mutation           | 4 (50.0)                               | 3 (23.1)                                    | 7 (33.3)            |         |
| CNS metastasis             |                                        |                                             |                     | 0.86    |
| Yes                        | 4 (50.0)                               | 7 (53.8)                                    | 14 (34.1)           |         |
| No                         | 4 (50.0)                               | 6 (46.2)                                    | 27 (65.9)           |         |

EGFR, epidermal growth factor receptor; ECOG, Eastern Cooperative Oncology Group; CNS, central nervous system.
